# Supplementary material for: Soil and Groundwater Investigation for Sustainable Agricultural Development: A Case Study from Brunei Darussalam
Source: MDPI journal article supplement (doi:10.3390/su14031388), 2022-01-26
Supplement: s1 [file s1]

# Supplementary Materials: Soil and Groundwater Investigation for Sustainable Agricultural Development: A Case Study from Brunei Darussalam

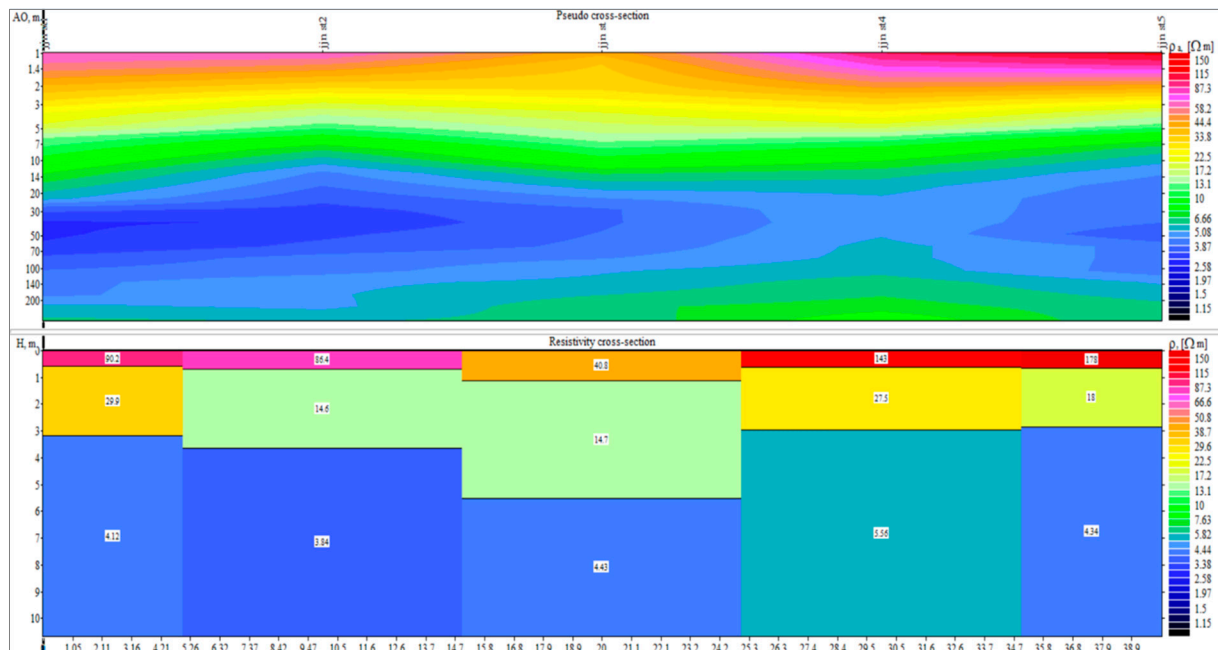

Figure S1. Pseudo section and resistivity section for VES Profile 1 at Site-1.

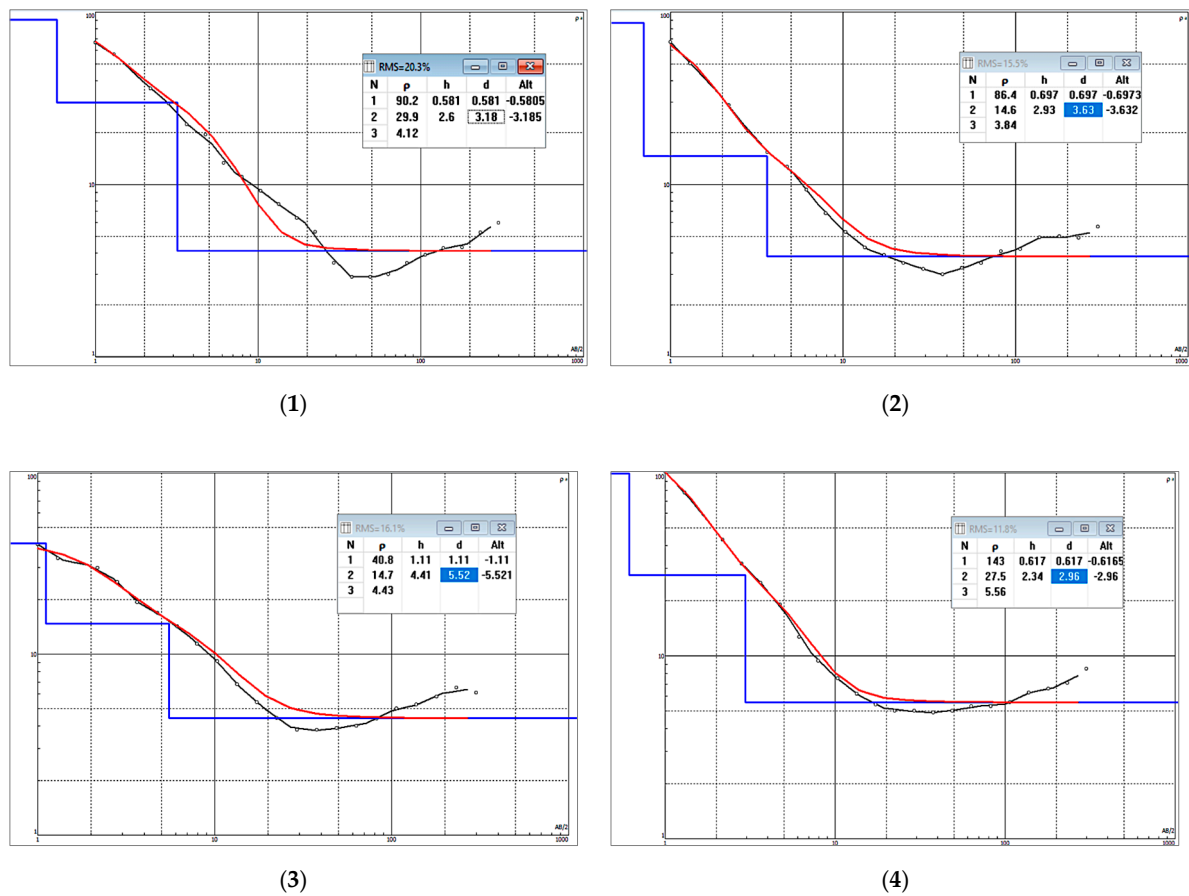

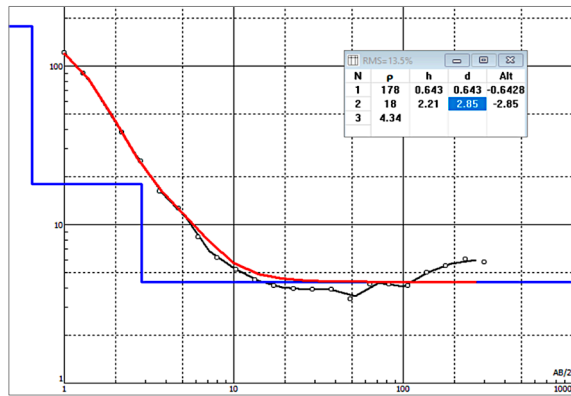

(5)

Figure S2. Interpretation of VES curve for stations 1-5 of Profile 1.

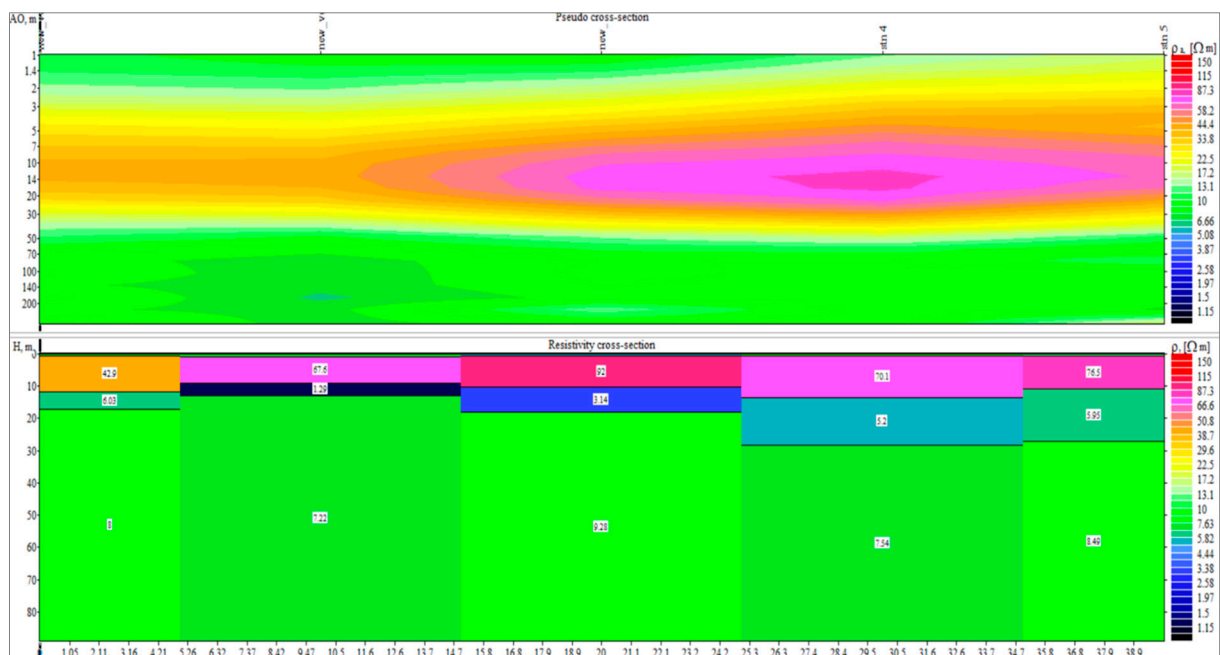

Figure S3. Pseudo section and resistivity section for VES Profile 2 at Site-2.

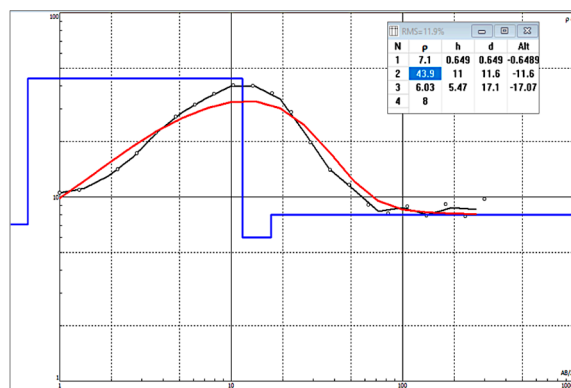

(1)

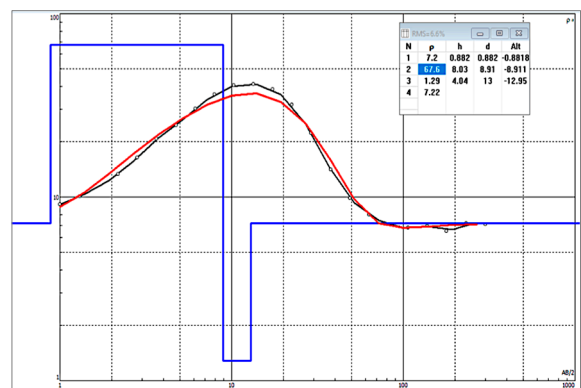

(2)

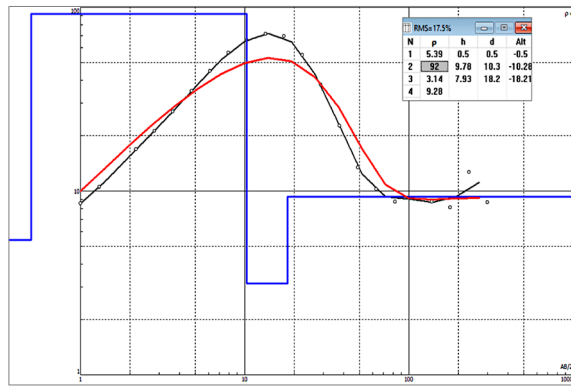

(3)

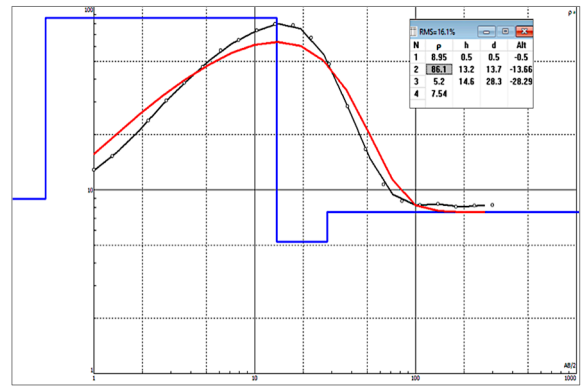

(4)

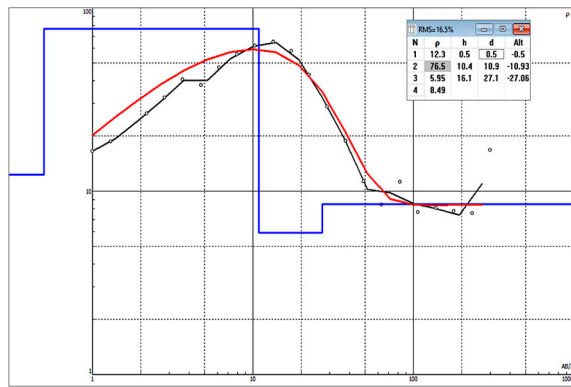

(5)

Figure S4. Interpretation of VES curve for stations 1-5 of Profile 2.

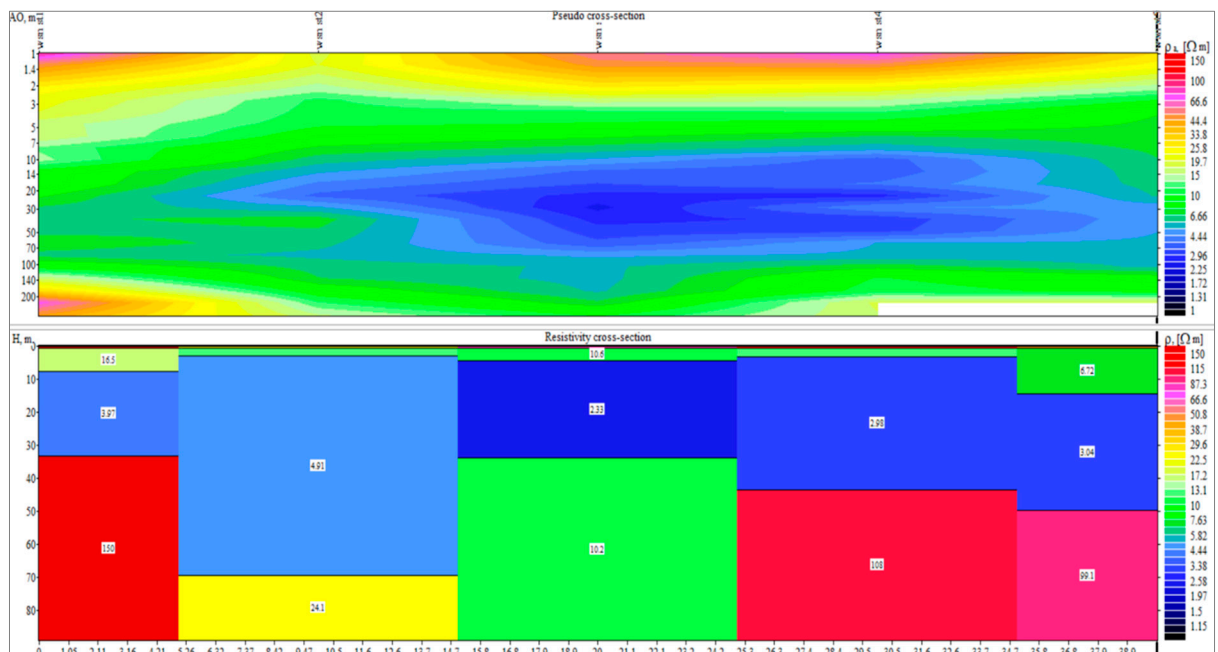

Figure S5. Pseudo section and resistivity section for VES Profile 3 at Site-3.

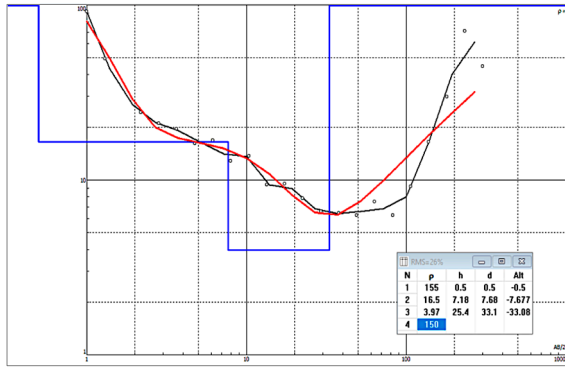

(1)

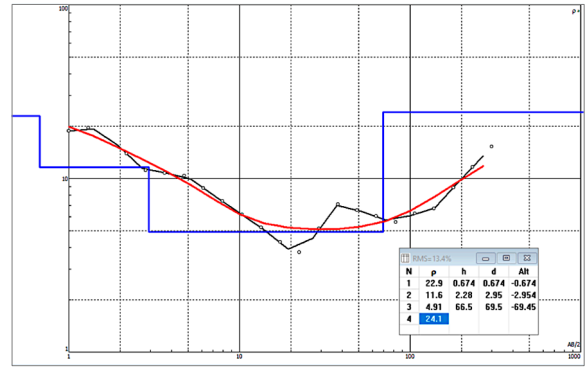

(2)

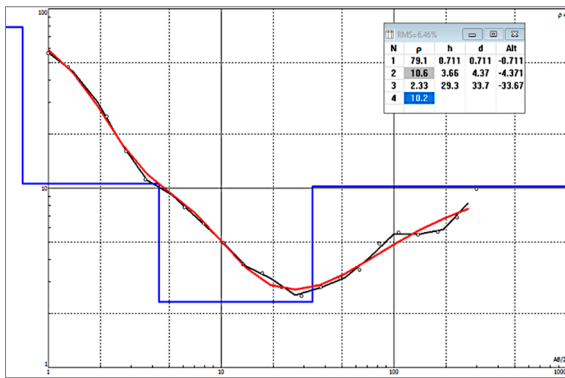

(3)

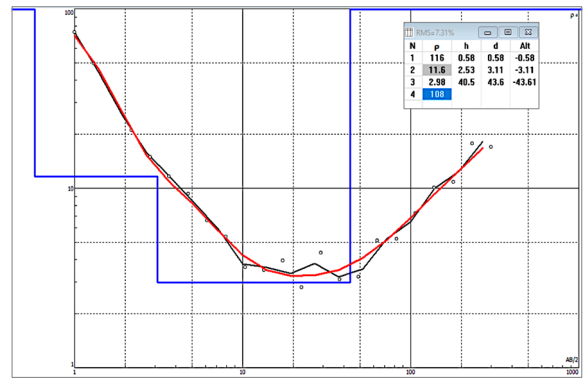

(4)

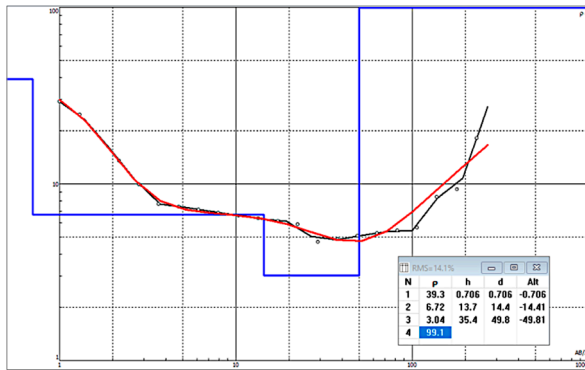

(5)

Figure S6. Interpretation of VES curve for stations 1-5 of Profile 3.
