# Supplementary material for: Soil and Groundwater Investigation for Sustainable Agricultural Development: A Case Study from Brunei Darussalam
Source: MDPI journal article supplement (doi:10.3390/su14031388), 2022-01-26
Supplement: s1 [file s1]

Archive with 1 entries (1 files):
- sustainability-1523352-SI.pdf
